# Supplementary material for: Diagnostic accuracy of handheld cardiac ultrasound device for assessment of left ventricular structure and function: systematic review and meta-analysis
Source: PubMed Central journal article supplement (PMC8562308; doi:10.1136/heartjnl-2021-319561), 2021-08-06
Supplement: heartjnl-2021-319561supp001.pdf [file heartjnl-2021-319561supp001.pdf]

## HUD MA Supplementary Material

## Search terms used in MA

## Medline

|   |                                                                                               |         |
|---|-----------------------------------------------------------------------------------------------|---------|
| 5 | (handheld OR hand?held OR pocket?siz* OR hand?carried OR mobile OR bed?side OR bedside).ti,ab | 141,288 |
| 6 | (echocardiogram OR echocardiography OR ultrasound).ti,ab                                      | 359,331 |
| 7 | (5 AND 6)                                                                                     | 6,198   |

## EMBASE

|   |                                                                                               |         |
|---|-----------------------------------------------------------------------------------------------|---------|
| 1 | (handheld OR hand?held OR pocket?siz* OR hand?carried OR mobile OR bed?side OR bedside).ti,ab | 183,391 |
| 2 | (echocardiogram OR echocardiography OR ultrasound).ti,ab                                      | 580,544 |
| 3 | (1 AND 2)                                                                                     | 11,019  |

**Table 1.** Individual study data incorporated into the meta-analysis.

| Study               | Parameter                                 | Threshold                                              | Whole Sample Size | Total Number Measured | Total Number Positive | Sensitivity (%) | Specificity (%) | PPV (%) | NPV (%) |
|---------------------|-------------------------------------------|--------------------------------------------------------|-------------------|-----------------------|-----------------------|-----------------|-----------------|---------|---------|
| <b>LVEF</b>         |                                           |                                                        |                   |                       |                       |                 |                 |         |         |
| Aldaas (exp) 2019   | LV border detection and tracking          | LVEF <50% - At least adequate image quality            | 70                | 56                    | 8                     | 75              | 98              | N/A     | N/A     |
| Aldaas (inexp) 2019 | LV border detection and tracking          | LVEF <50% - At least adequate image quality            | 70                | 56                    | 8                     | 75              | 100             | 100     | 96      |
| Alexander 2004      | Visual estimation of LV systolic function | LVEF <55%                                              | 537               | 533                   | 223                   | 82              | 71              | 67      | 85      |
| Andersen 2011       | Qualitative assessment                    | SE>=moderate pathology                                 | 108               | 108                   | 35                    | 97              | 99              | 97      | 99      |
| Biais 2012          | Visual estimation of LV systolic function | LVEF <50%                                              | 151               | 151                   | 28                    | 86              | 99              | 96      | 97      |
| Decara (exp) 2003   | Qualitative assessment                    | LV dysfunction                                         | 300               | 149                   | 38                    | 89              | N/A             | N/A     | N/A     |
| Decara (inexp) 2003 | Qualitative assessment                    | LV dysfunction                                         | 300               | 151                   | 47                    | 97              | N/A             | N/A     | N/A     |
| Fedson 2003         | Qualitative assessment                    | >=mild                                                 | 103               | 39                    | 11                    | 73              | 64              | 44      | 86      |
| Galasko 2003        | Visual estimation of LV systolic function | LVEF <50%                                              | 562               | 531                   | 51                    | 96              | 98              | 83      | 99.6    |
| Ghani 2006          | Visual estimation of LV systolic function | LVEF <40%                                              | 80                | 73                    | 16                    | 75              | 91              | 71      | 93      |
| Gulic (exp) 2016    | Qualitative assessment                    | Any reduction in LVEF                                  | 200               | 200                   | 22                    | 72              | 94              | 64      | 97      |
| Gulic (inexp) 2016  | Qualitative assessment                    | Any reduction in LVEF                                  | 200               | 200                   | 22                    | 84              | 92              | 58      | 98      |
| Khan 2014           | Visual estimation of LV systolic function | Normal >=55%, moderate 35%-<55%, severely reduced <35% | 240               | 239                   | 70                    | 93              | 92              | 84      | 97      |

|                      |                                                                              |                       |     |     |     |      |      |    |      |
|----------------------|------------------------------------------------------------------------------|-----------------------|-----|-----|-----|------|------|----|------|
| Kirkpatrick 2005     | Visual estimation of LV systolic function                                    | LVEF <40%             | 63  | 63  | 3   | 100  | 83   | 23 | 100  |
| Kobal 2005           | Visual estimation of LV systolic function                                    | LVEF <50%             | 61  | 61  | 22  | 86   | 82   | 73 | 91   |
| Liebo (expDR) 2011   | Visual estimation of LV systolic function                                    | LVEF <45%             | 97  | 91  | 13  | 85   | 99   | 92 | 97   |
| Liebo (expMS) 2011   | Visual estimation of LV systolic function                                    | LVEF <45%             | 97  | 90  | 12  | 92   | 99   | 92 | 99   |
| Liebo (inexpRI) 2011 | Visual estimation of LV systolic function                                    | LVEF <45%             | 97  | 97  | 13  | 85   | 93   | 65 | 98   |
| Liebo (inexpML) 2011 | Visual estimation of LV systolic function                                    | LVEF <45%             | 97  | 92  | 11  | 73   | 98   | 80 | 96   |
| Lopez-Palmero 2015   | Qualitative assessment                                                       | Normal or depressed   | 223 | 212 | 85  | 95.2 | 93.7 | 91 | 96.7 |
| Martin 2009          | Qualitative assessment                                                       | Normal or abnormal    | 354 | 336 | 124 | 81   | 92   | 85 | 89   |
| Mehta 2014           | Qualitative assessment                                                       | LVEF<40%              | 250 | 250 | 54  | 96   | 89   | 70 | 99   |
| Mjølstad 2013        | Systolic excursion of AV plane and visual estimation of LV systolic function | LVEF <45% = moderate+ | 199 | 129 | 30  | 92   | 94   | 80 | 98   |
| Nilsson 2019         | Visual estimation of LV systolic function                                    | LVEF<50%              | 100 | 140 | 19  | 47   | 81   | 28 | 91   |
| Oleson 2015          | Qualitative assessment                                                       | LVEF<50%              | 260 | 255 | 125 | 65   | 83   | 79 | 71   |
| Razi 2011            | Visual estimation of LV systolic function                                    | LVEF <40%             | 50  | 50  | 33  | 94   | 94   | 97 | 88   |
| Ruddox 2013          | Visual estimation of LV systolic function                                    | LVEF<40%              | 303 | 283 | 81  | 57   | 92   | 74 | 84   |
| Stokke (inexp) 2014  | Visual estimation of LV systolic function                                    | LVEF <45%             | 72  | 105 | 61  | 90   | 57   | 74 | 81   |

|                      |                                                                               |               |     |     |    |      |      |      |      |
|----------------------|-------------------------------------------------------------------------------|---------------|-----|-----|----|------|------|------|------|
| Stokke (exp) 2014    | Visual estimation of LV systolic function                                     | LVEF <45%     | 72  | 101 | 59 | 92   | 67   | 79   | 85   |
| Vignon 2004          | Not specified                                                                 | Not specified | 55  | 42  | 22 | 91   | 89   | 91   | 89   |
| Vourvouri 2003       | Visual estimation of LV systolic function                                     | LVEF <40%     | 88  | 82  | 19 | 89   | 98   | 94   | 97   |
| Xie 2006             | Not Specified                                                                 | LVEF<50%      | 100 | 100 | 33 | 91   | 99   | 97   | 96   |
| <b>WMA</b>           |                                                                               |               |     |     |    |      |      |      |      |
| Bruce 2002           | Qualitative assessment                                                        | Present       | 374 | 124 | 97 | 88   | 82   | 94   | 65   |
| Cullen 2013          | Based on 16-segment model                                                     | Present       | 190 | 190 | 15 | 60   | 95   | 50   | 97   |
| Decara (exp) 2003    | Qualitative assessment                                                        | Present       | 300 | 149 | 14 | 79   | N/A  | N/A  | N/A  |
| Decara (inexp) 2003  | Qualitative assessment                                                        | Present       | 300 | 151 | 20 | 55   | N/A  | N/A  | N/A  |
| Fedson 2003          | Qualitative assessment                                                        | Present       | 103 | 39  | 0  | N/A  | 90   | N/A  | N/A  |
| Giusca 2010          | Not Specified                                                                 | Present       | 56  | 52  | 23 | 65.2 | 89.5 | 76.5 | 83.3 |
| Khan 2014            | Lack of normal systolic thickening or translational motion towards centreline | Present       | 240 | 232 | 94 | 86   | 97   | 95   | 91   |
| Liebo (expDR) 2011   | Lack of normal systolic thickening or translational motion towards centreline | Present       | 97  | 90  | 15 | 67   | 91   | 53   | 95   |
| Liebo (expMS) 2011   | Lack of normal systolic thickening or translational motion towards centreline | Present       | 97  | 74  | 11 | 82   | 94   | 69   | 97   |
| Liebo (inexpRI) 2011 | Lack of normal systolic thickening or translational motion towards centreline | Present       | 97  | 76  | 10 | 80   | 85   | 44   | 97   |

|                      |                                                                               |                                   |     |     |    |     |     |     |      |
|----------------------|-------------------------------------------------------------------------------|-----------------------------------|-----|-----|----|-----|-----|-----|------|
| Liebo (inexpML) 2011 | Lack of normal systolic thickening or translational motion towards centreline | Present                           | 97  | 80  | 10 | 60  | 94  | 60  | 94   |
| Lucas 2009           | Abnormal wall movement/thickening during systole                              | Present                           | 322 | 314 | 80 | 85  | 88  | 71  | 95   |
| Lucas 2011           | Abnormal wall movement/thickening during systole                              | Present                           | 210 | 210 | 67 | 84  | 85  | 73  | 92   |
| Ruddox 2013          | Visual estimation                                                             | Present                           | 303 | 261 | 96 | 76  | 88  | 79  | 86   |
| Vignon 2004          | Not specified                                                                 | Not specified                     | 55  | 23  | 21 | 90  | 100 | 100 | 50   |
| Wejner-Mik 2019      | Visual estimation                                                             | Present                           | 87  | 85  | 50 | 88  | 97  | 98  | 86   |
| Xie 2006             | Not Specified                                                                 | Present                           | 100 | 100 | 36 | 97  | 98  | 97  | 98   |
|                      |                                                                               |                                   |     |     |    |     |     |     |      |
| <b>LV Dilation</b>   |                                                                               |                                   |     |     |    |     |     |     |      |
|                      |                                                                               |                                   |     |     |    |     |     |     |      |
| Biais 2012           | Qualitative assessment                                                        | Yes/No<br>SE=LV dilation<br>>55mm | 151 | 151 | 8  | 94  | 96  | 57  | 100  |
| Coletta 2006         | LVEDD                                                                         | Normal<br>30mm/m2                 | 112 | 105 | 87 | 100 | 65  | 93  | 100  |
| Giusca 2010          | LV diameter                                                                   | >59mm                             | 56  | 52  | 7  | 71  | 100 | 100 | 95.7 |
| Gulic (exp) 2016     | Qualitative assessment                                                        | Yes/No                            | 200 | 200 | 9  | 44  | 97  | 50  | 97   |
| Gulic (inexp) 2016   | Qualitative assessment                                                        | Yes/No                            | 200 | 200 | 9  | 55  | 94  | 31  | 98   |
| Khan 2014            | LVEDD                                                                         | >53mm women,<br>>59mm men         | 240 | 225 | 33 | 87  | 98  | 91  | 98   |
| Kobal 2005           | Qualitative assessment                                                        | Yes/No<br>SE>56mm                 | 61  | 61  | 12 | 67  | 94  | 73  | 92   |
| Liebo (expDR) 2011   | LVEDD                                                                         | >53mm women,<br>>59mm men         | 97  | 92  | 15 | 67  | 99  | 91  | 94   |
| Liebo (expMS) 2011   | LVEDD                                                                         | >53mm women,<br>>59mm men         | 97  | 93  | 14 | 64  | 100 | 100 | 94   |

|                      |                                                    |                                |     |     |     |     |     |      |      |
|----------------------|----------------------------------------------------|--------------------------------|-----|-----|-----|-----|-----|------|------|
| Liebo (inexpRI) 2011 | LVEDD                                              | >53mm women, >59mm men         | 97  | 92  | 15  | 73  | 95  | 73   | 95   |
| Liebo (inexpML) 2011 | LVEDD                                              | >53mm women, >59mm men         | 97  | 90  | 15  | 53  | 97  | 80   | 91   |
| Lopez-Palmero 2015   | LVEDD                                              | >53mm women, >59mm men         | 223 | 212 | 34  | 94  | 97  | 84.2 | 98.8 |
| Ruddox 2013          | LVEDD                                              | Not specified                  | 303 | 293 | 52  | 46  | 93  | 60   | 89   |
| Xie 2006             | LVEDD                                              | LVEDD $\geq$ 55mm              | 100 | 100 | 19  | 89  | 99  | 94   | 98   |
|                      |                                                    |                                |     |     |     |     |     |      |      |
| <b>LVH</b>           |                                                    |                                |     |     |     |     |     |      |      |
|                      |                                                    |                                |     |     |     |     |     |      |      |
| Biais 2012           | Qualitative assessment                             | Yes/No SE=IVS>13mm             | 151 | 151 | 26  | 77  | 97  | 83   | 95   |
| Coletta 2006         | IVS                                                | Normal 12mm                    | 112 | 105 | 82  | 97  | 79  | 94   | 88   |
| Coletta 2006         | PW                                                 | Normal 12mm                    | 112 | 105 | 93  | 97  | 70  | 96   | 74   |
| Decara (exp) 2003    | Qualitative assessment                             | Severe                         | 300 | 149 | 1   | 100 | N/A | N/A  | N/A  |
| Galasko 2003         | IVS or PW                                          | $\geq$ 13mm                    | 562 | 540 | 31  | 94  | 93  | 45   | 99.6 |
| Galasko 2003         | IVS or PW                                          | $\geq$ 12mm                    | 562 | 540 | 55  | 82  | 96  | 69   | 98   |
| Giusca 2010          | End-diastolic thickness of interventricular septum | $\geq$ 11mm                    | 56  | 52  | 9   | 56  | 100 | 100  | 91.5 |
| Gulic (exp) 2016     | Qualitative assessment                             | Yes/No SE=IVS>14mm             | 200 | 200 | 108 | 72  | 75  | 77   | 70   |
| Gulic (inexp) 2016   | Qualitative assessment                             | Yes/No SE=IVS>14mm             | 200 | 200 | 108 | 83  | 58  | 70   | 75   |
| Kobal 2005           | Qualitative assessment                             | Yes/No SE=IVS/PW $\geq$ 12mm   | 61  | 61  | 23  | 65  | 71  | 58   | 77   |
| Lopez-Palmero 2015   | IVS or PW                                          | >10mm                          | 223 | 212 | 134 | 96  | 91  | 94.8 | 92.2 |
| Lucas 2009           | Posterior/septal wall thickness                    | $\geq$ 12mm                    | 322 | 314 | 33  | 70  | 73  | 23   | 95   |
| Lucas 2011           | Posterior/septal wall thickness                    | $\geq$ 1.4 (M), $\geq$ 1.3 (F) | 210 | 209 | 34  | 50  | 68  | 23   | 88   |

|                    |                       |                                                     |     |     |    |     |    |    |     |
|--------------------|-----------------------|-----------------------------------------------------|-----|-----|----|-----|----|----|-----|
| Perez-Avraham 2010 | IVS or PW             | IVS $\geq$ 11.7,<br>PW $\geq$ 9.8                   | 85  | 85  | 18 | 100 | 99 | 95 | 100 |
| Senior 2004        | LVMi                  | >134gm <sup>2</sup> /m <sup>2</sup><br>(M), 110 (F) | 189 | 179 | 46 | 72  | 91 | 73 | 90  |
| Vourvouri 2002     | LVMi                  | >134gm <sup>2</sup> /m <sup>2</sup><br>(M), 110 (F) | 100 | 100 | 18 | 83  | 96 | 79 | 96  |
| Xie 2006           | Septal wall thickness | $\geq$ 12mm                                         | 100 | 100 | 41 | 80  | 93 | 89 | 87  |
|                    |                       |                                                     |     |     |    |     |    |    |     |

We extracted and collated data using a standardised, agreed upon, data extraction form. Data collected included:

1. Methods:
  - Study design
  - Total duration of study
  - Study setting
  - Date of study
  - Country of study
2. Participants:
  - Number included and analysed for the index and reference test
  - Mean age
  - Gender
  - Inclusion criteria
  - Exclusion criteria.
3. Index test:
  - Type of HUD
  - Experience of operators
  - Number of operators
  - Time between index and reference test
4. Reference Standard:
  - Type of standard echocardiography
  - Experience of operators
  - Number of operators
5. Outcomes: LV parameters including function, dilatation, wall motion abnormality and hypertrophy.
6. Thresholds:
  - LVEF
    - Mild = LVEF 45-55%
    - Moderate/severe = LVEF <45%
  - LV dilatation
    - LVEDD >53mm
  - WMA
    - Present/absent
  - LVH
    - Interventricular septum/posterior wall >10mm
7. Diagnostic data:

- Sensitivity/specificity/PPV/NPV
- TP/TN/FP/FN
- Prevalence
- Total number measured



**Table 2.** Diagnostic odds ratios for HUD cardiac assessment.

| Characteristic                           | DOR Overall (CI)      | DOR Experienced (CI)    | DOR Inexperienced (CI) | p-value |
|------------------------------------------|-----------------------|-------------------------|------------------------|---------|
| <b>LVEF (any abnormality)</b>            | 58.63 (26.11-131.63)  | 131.24 (37.75-456.22)   | 28.11 (11.19-70.56)    | 0.051   |
| <b>LVEF (moderate/severe)</b>            | 88.55 (38.88-201.68)  | 276.02 (57.70-1320.41)  | 41.45 (18.34-93.72)    | 0.035   |
| <b>WMA</b>                               | 40.81 (25.19-66.10)   | 89.97 (30.56-264.86)    | 28.34 (19.76-40.63)    | 0.047   |
| <b>LVH</b>                               | 26.69 (11.27-78.25)   | 54.92 (13.96-216.08)    | 18.17 (5.05-65.41)     | 0.248   |
| <b>LVH (quantitative only)</b>           | 54.69 (11.99-249.45)  | 96.59 (50.81-183.59)    | 39.48 (4.81-323.90)    | 0.436   |
| <b>LV Dilatation</b>                     | 95.81 (40.12-228.85)  | 224.63 (87.38-577.51)   | 44.84 (16.38-122.77)   | 0.022   |
| <b>LV Dilatation (quantitative only)</b> | 142.29 (42.94-471.48) | 405.51 (143.18-1148.50) | 62.41 (14.30-272.40)   | 0.042   |

**Table 3.** Heterogeneity assessment and evaluation of operator experience on the diagnostic performance of HUD.

| HUD Parameter | Heterogeneity Assessment                          | Operator Experience                   |         |
|---------------|---------------------------------------------------|---------------------------------------|---------|
|               | Correlation coefficient between log Sp and log SN | Meta-regression covariate coefficient | P value |
| LVEF          | 0.3                                               | -1.64                                 | 0.04    |
| LVEF <40      | -0.14                                             | -1.65                                 | 0.04    |
| LV dilatation | -0.39                                             | -0.09                                 | 0.88    |
| LVH           | 0.39                                              | -1.08                                 | 0.31    |
| WMA           | -0.06                                             | -1.055                                | 0.01    |

Contrary to intervention meta-analyses, the  $I^2$  statistic is not a reliable indicator for heterogeneity in diagnostic test accuracy reviews and therefore was not assessed(1). Instead, heterogeneity can be analysed by estimating the correlation between sensitivity and specificity(2). In a normal ROC curve, an increase in sensitivity is offset by a decrease in specificity and therefore they have a negative correlation. A correlation coefficient larger than zero indicates possible heterogeneity. The correlation coefficient of the logit-transformed sensitivity and specificity was calculated for all variables.

The sensitivity and specificity are proportion data and limited between the lower and upper limits of 0 and 1. To apply the correlation statistics and meet its distribution assumption, the proportion data are logit-transformed to release the upper and lower limits of the sensitivity and specificity data(2).

We planned to assess the effect of operator experience, pre-existing comorbidities and baseline LV function on the results in a meta-regression covariate analysis. However, only operator experience was sufficiently reported and showed that experience was a significant factor in detecting LVEF, WMA and LV dilatation.

| Domain             | Risk of bias (%) |         |     |
|--------------------|------------------|---------|-----|
|                    | High             | Unclear | Low |
| Flow and Timing    | 3                | 27      | 70  |
| Reference Standard | 9                | 15      | 76  |
| Index Test         | 3                | 15      | 82  |
| Patient Selection  | 0                | 21      | 79  |

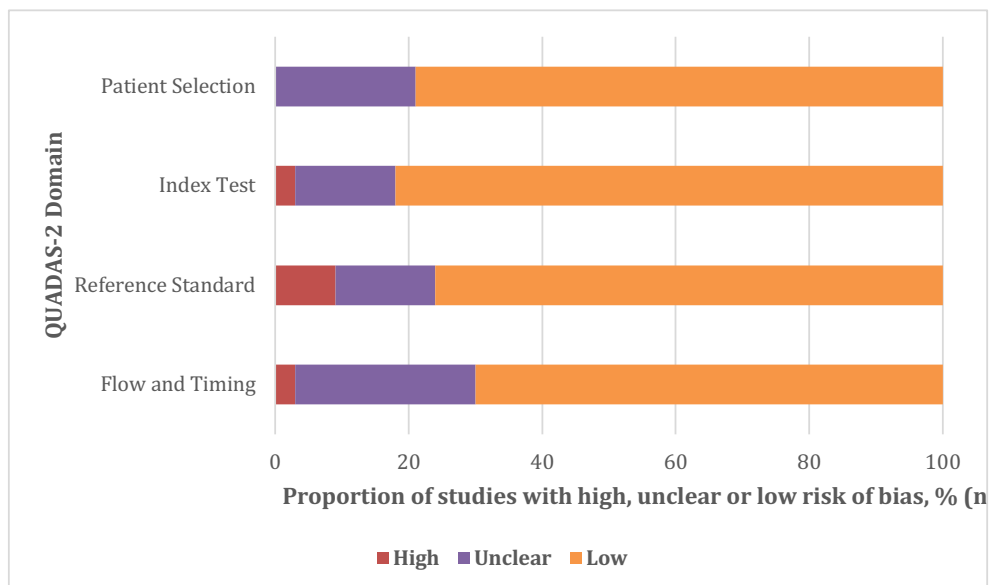

**Figure 1.** Tabulated and graphical displays for QUADAS-2 results.

The risk of bias was qualitatively assessed based on the domains of the Quality Assessment of Diagnostic Accuracy Studies (QUADAS)-2 tool. Parameters evaluated included random or consecutive recruitment of patients (patient sampling), blinding of assessors to index and reference test, and the time between HUD and TTE (flow and timing). Two reviewers (SJ and PG) independently assessed the risk of bias for each study with disagreements discussed with a third author (SA). Studies categorised as low for all domains were regarded as having a low risk of bias. Studies stated as being high or unclear in  $\geq 1$  domain were judged to be at risk of bias.

| Study              | Patient Sampling                  | Index Test         | Reference Test     | Flow and Timing          |
|--------------------|-----------------------------------|--------------------|--------------------|--------------------------|
|                    | Random or consecutive recruitment | HHE Blinded to TTE | TTE Blinded to HHE | Time between HHE and TTE |
| Aldaas 2019        | +                                 | !                  | !                  | !                        |
| Alexander 2004     | !                                 | !                  | +                  | +                        |
| Biais 2012         | +                                 | +                  | +                  | +                        |
| Bruce 2002         | !                                 | +                  | +                  | -                        |
| Coletta 2006       | +                                 | +                  | +                  | +                        |
| Cullen 2013        | +                                 | +                  | +                  | +                        |
| DeCara 2003        | !                                 | +                  | +                  | !                        |
| Fedson 2003        | +                                 | +                  | !                  | !                        |
| Galasko 2003       | +                                 | +                  | -                  | !                        |
| Giusca 2010        | +                                 | +                  | +                  | +                        |
| Gulic 2016         | +                                 | +                  | !                  | !                        |
| Khan 2014          | +                                 | +                  | +                  | +                        |
| Kobal 2005         | +                                 | +                  | +                  | +                        |
| Liebo 2011         | +                                 | +                  | +                  | +                        |
| Lopez-Palmero 2015 | !                                 | +                  | +                  | +                        |
| Lucas 2009         | +                                 | +                  | +                  | +                        |
| Lucas 2011         | +                                 | -                  | -                  | +                        |
| Martin 2009        | +                                 | +                  | -                  | +                        |
| Nilsson 2019       | +                                 | !                  | !                  | +                        |
| Oleson 2015        | +                                 | +                  | +                  | +                        |
| Perez-Avraham 2010 | +                                 | +                  | +                  | !                        |
| Ruddox 2013        | +                                 | +                  | +                  | +                        |
| Wejner-Mik 2019    | +                                 | +                  | +                  | +                        |
| Xie 2006           | +                                 | +                  | +                  | +                        |
| Vignon 2004        | +                                 | +                  | +                  | +                        |

  

|                         |   |
|-------------------------|---|
| <b>Risk of bias</b>     |   |
| High                    | - |
| Some concerns / unclear | ! |
| Low                     | + |

**Figure 2.** Risk of bias summary for each included study

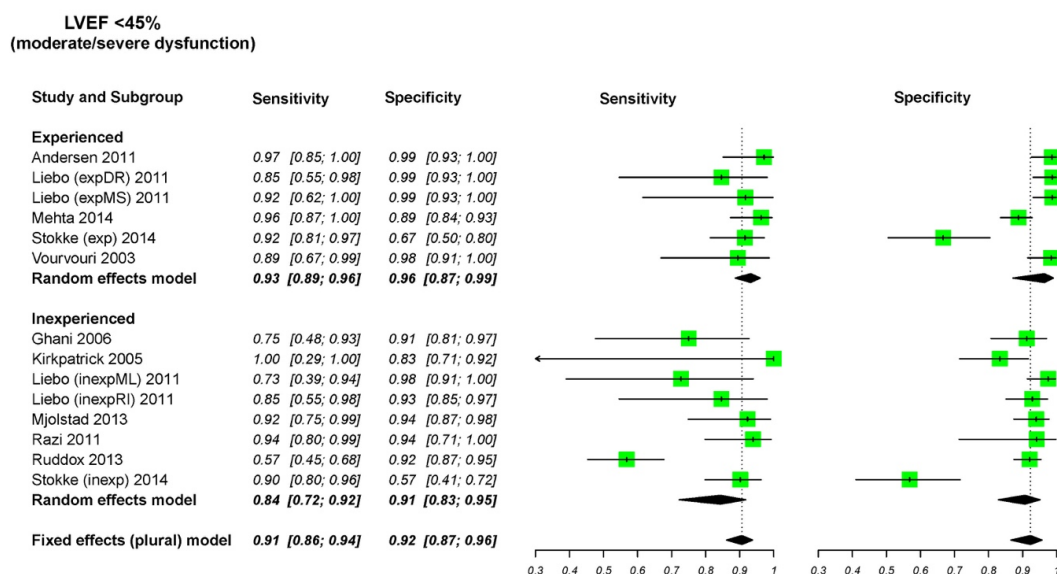

**Figure 3.** Meta-analyses of LVEF <45%. Sensitivity and specificity [CI] values are reported.

The bivariate method was used to calculate overall sensitivity and specificity and their 95% confidence intervals. The summary estimates of sensitivity and specificity using this method represent the average operating point across studies. The bivariate nature of the input data is maintained throughout the analysis using the bivariate model which allows the calculation of reliable summary estimates. Other advantages of the bivariate method include accounting for the study size, between-study heterogeneity and adjusting for the threshold effect seen when there is a negative correlation between the sensitivity and the specificity of the index test(3).

## References

1. Macaskill P, Gatsonis C, Deeks J, Harbord R, Takwoingi Y. Cochrane Handbook for Systematic Reviews of Diagnostic Test Accuracy. :61.
2. Shim SR, Kim S-J, Lee J. Diagnostic test accuracy: application and practice using R software. *Epidemiol Health* [Internet]. 2019 Mar 28 [cited 2021 Mar 26];41. Available from: <https://www.ncbi.nlm.nih.gov/pmc/articles/PMC6545496/>
3. Reitsma JB, Glas AS, Rutjes AWS, Scholten RJPM, Bossuyt PM, Zwinderman AH. Bivariate analysis of sensitivity and specificity produces informative summary measures in diagnostic reviews. *J Clin Epidemiol*. 2005 Oct;58(10):982–90.
